# Supplementary material for: Structural Insights into Protein–Aptamer Recognitions Emerged from Experimental and Computational Studies
Source: Int J Mol Sci. 2023 Nov 14;24(22):16318. doi: 10.3390/ijms242216318 (PMC10671752; doi:10.3390/ijms242216318)
Supplement: Supplementary file 1 [file ijms-24-16318-s001.zip]

Archive with 5 entries (5 files):
- SupplMat_Sica_p.pdf
- TableS1.xls
- TableS2.xls
- TableS3.xls
- TableS4.xls
