# Supplementary material for: Structural Insights into Protein–Aptamer Recognitions Emerged from Experimental and Computational Studies
Source: Int J Mol Sci. 2023 Nov 14;24(22):16318. doi: 10.3390/ijms242216318 (PMC10671752; doi:10.3390/ijms242216318)
Supplement: Supplementary file 1 [file ijms-24-16318-s001.zip › TableS1.xls]

## Sheet: Table S1
PDB ID	Experimental method	Release Date	PDB Entry Title
148D	NMR	1994-04-30	Three-dimensional solution structure of the thrombin binding DNA aptamer D(GGTTGGTGTGGTTGG)
1HUT	X-ray crystallography	1994-06-22	The structure of alpha-thrombin inhibited by a 15-mer single-stranded DNA aptamer
1HAO	X-ray crystallography	1996-04-03	Complex of human alpha-thrombin with a 15mer oligonucleotide GGTTGGTGTGGTTGG (based on NMR model of DNA)
1HAP	X-ray crystallography	1996-04-03	Complex of human alpha-thrombin with a 15mer oligonucleotide GGTTGGTGTGGTTGG (based on X-ray model of DNA)
1FMN	NMR	1996-07-11	Solution structure of FMN-RNA aptamer complex, NMR, 5 structures
1KOC	NMR	1996-08-17	RNA aptamer complexed with arginine, NMR
1KOD	NMR	1996-11-08	RNA aptamer complexed with citrulline, NMR
1QDF	NMR	1996-11-08	The NMR study of DNA quadruplex structure, aptamer (15mer) DNA
1QDH	NMR	1996-11-08	The NMR study of DNA quadruplex structure, aptamer (15mer) DNA
1RAW	NMR	1997-01-27	ATP binding RNA aptamer in complex with AMP, NMR, 10 structures
1OLD	NMR	1997-04-21	NMR structure of 24-mer deoxyribonucleic acid, 7 structures
1TOB	NMR	1997-06-16	Saccharide-RNA recognition in an aminoglycoside antibiotic-RNA aptamer complex, NMR, 7 structures
1AM0	NMR	1997-07-23	AMP RNA aptamer complex, NMR, 8 structures
1ULL	NMR	1997-08-20	RNA aptamer complexed with HIV-1 rev peptide, NMR, 7 structures
1AW4	NMR	1998-04-15	Structural basis of DNA folding and recognition in AMP-DNA aptamer complex, NMR, 7 structures
6MSF	X-ray crystallography	1998-07-08	F6 aptamer MS2 coat protein complex
5MSF	X-ray crystallography	1998-11-11	MS2 protein capsid/RNA complex
7MSF	X-ray crystallography	1998-11-11	MS2 protein capsid/RNA complex
2ARG	NMR	1999-03-23	Formation of an amino acid binding pocket through adaptive zippering-up of a large DNA hairpin loop, NMR, 9 structures
2TOB	NMR	1999-06-22	Solution structure of the tobramycin-RNA aptamer complex, NMR, 13 structures
1C32	NMR	1999-08-18	Solution structure of a quadruplex forming DNA and its intermidiate
1C34	NMR	1999-08-18	Solution structure of a quadruplex forming DNA and its intermidiate
1C35	NMR	1999-08-18	Solution structure of a quadruplex forming DNA and its intermidiate
1C38	NMR	1999-08-25	Solution structure of a quadruplex forming DNA and its intermidiate
1NEM	NMR	1999-08-31	Saccharide-RNA recognition in the neomycin B / RNA aptamer complex
484D	NMR	1999-10-14	Solution structure of HIV-1 rev peptide-RNA aptamer complex
1DDY	X-ray crystallography	2000-01-01	Molecular recognition by the vitamin B12 RNA aptamer
1DB6	NMR	2000-02-03	Solution structure of the DNA aptamer 5'-CGACCAACGTGTCGCCTGGTCG-3' complexed with argininamide
1EXD	X-ray crystallography	2000-05-15	Crystal structure of a tight-binding glutamine tRNA bound to glutamine aminoacyl tRNA synthetase
1EXY	NMR	2000-05-15	Solution structure of HTLV-1 peptide bound to its RNA aptamer target
1F27	X-ray crystallography	2000-06-12	Crystal structure of a biotin-binding RNA pseudoknot
1F1T	X-ray crystallography	2000-09-04	Crystal structure of the malachite green aptamer complexed with tetramethyl-rosamine
1ET4	X-ray crystallography	2000-11-13	Crystal structure of a vitamin B12 binding RNA aptamer with ligand at 2.3 A
1I34	NMR	2001-06-27	Solution DNA quadruplex with double chain reversal loop and two diagonal loops connecting GGGG tetrads flanked by G-(T-T) triad and T-T-T triple
1O15	NMR	2003-02-18	Theophylline-binding RNA in complex with theophylline, NMR, regularized mean structure, refinement with torsion angle and base-base positional database potentials and dipolar couplings
1K8J	NMR	2003-04-15	NMR structure of the CK14 DNA duplex: a portion of the known NF-kB sequence CK1
1K8L	NMR	2003-04-15	XBY6: An analog of CK14 containing 6 dithiophosphate groups
1K8N	NMR	2003-04-15	NMR structure of the XBY2 DNA duplex, an analog of CK14 containing phosphorodithioate groups at C22 and C24
1NTA	X-ray crystallography	2003-05-13	2.9 A crystal structure of Streptomycin RNA-aptamer
1NTB	X-ray crystallography	2003-05-13	2.9 A crystal structure of Streptomycin RNA-aptamer complex
1OOA	X-ray crystallography	2003-07-22	Crystal structure of NF-kB(p50)2 complexed to a high-affinity RNA aptamer
1RDE	NMR	2003-11-11	NMR structure of the thrombin-binding DNA aptamer stabilized by Sr2+
1NBK	NMR	2003-12-03	The structure of RNA aptamer for HIV Tat complexed with two argininamide molecules
1Q8N	NMR	2004-03-23	Solution Structure of the Malachite Green RNA Binding Aptamer
1S9L	NMR	2004-06-29	NMR Solution Structure of a Parallel LNA Quadruplex
1U1Y	X-ray crystallography	2004-12-07	Crystal structure of a complex between WT bacteriophage MS2 coat protein and an F5 aptamer RNA stemloop with 2aminopurine substituted at the-10 position
1Y26	X-ray crystallography	2004-12-28	A-riboswitch-adenine complex
1Y27	X-ray crystallography	2004-12-28	G-riboswitch-guanine complex
1Y8D	NMR	2005-02-01	Dimeric parallel-stranded tetraplex with 3+1 5' G-tetrad interface, single-residue chain reversal loops and GAG triad in the context of A(GGGG) pentad
1XWP	NMR	2005-02-15	Solution structure of AUCGCA loop
1XWU	NMR	2005-02-15	Solution structure of ACAUAGA loop
2A0P	X-ray crystallography	2005-08-16	Crystal structure of RNA oligomer containing 4'-thioribose
2B63	X-ray crystallography	2005-12-06	Complete RNA Polymerase II-RNA inhibitor complex
2AU4	NMR	2006-03-28	Class I GTP aptamer
2B57	X-ray crystallography	2006-05-23	Guanine Riboswitch C74U mutant bound to 2,6-diaminopurine
2GIS	X-ray crystallography	2006-07-04	Structure of the S-adenosylmethionine riboswitch mRNA regulatory element
2EVY	NMR	2006-08-22	GNYA tetranucleotide loops found in poliovirus oriL by in vivo SELEX (un)expectedly form a YNMG-like structure
2IDN	NMR	2007-01-09	NMR structure of a new modified Thrombin Binding Aptamer containing a 5'-5' inversion of polarity site
2FY1	NMR	2007-02-06	A dual mode of RNA recognition by the RBMY protein
2QBZ	X-ray crystallography	2007-09-18	Structure of the M-Box Riboswitch Aptamer Domain
2PN9	NMR	2007-10-30	NMR structure of a kissing complex formed between the TAR RNA element of HIV-1 and a LNA modified aptamer
2EES	X-ray crystallography	2007-11-13	Guanine riboswitch A21U, U75A mutant bound to hypoxanthine
2EET	X-ray crystallography	2007-11-13	Guanine Riboswitch A21G, U75C mutant bound to hypoxanthine
2EEU	X-ray crystallography	2007-11-13	Guanine riboswitch U22A, A52U mutant bound to hypoxanthine
2EEV	X-ray crystallography	2007-11-13	Guanine riboswitch U22C, A52G mutant bound to hypoxanthine
2EEW	X-ray crystallography	2007-11-13	Guanine Riboswitch U47C mutant bound to hypoxanthine
2JWV	NMR	2008-01-08	Structure of a high affinity anti-NFkB RNA aptamer
2QWY	X-ray crystallography	2008-01-22	SAM-II riboswitch bound to S-adenosylmethionine
2OOM	NMR	2008-01-29	NMR structure of a kissing complex formed between the TAR RNA element of HIV-1 and a LNA/RNA aptamer
2RN1	NMR	2008-09-23	Liquid crystal solution structure of the kissing complex formed by the apical loop of the HIV TAR RNA and a high affinity RNA aptamer optimized by SELEX
3EGZ	X-ray crystallography	2008-10-28	Crystal structure of an in vitro evolved tetracycline aptamer and artificial riboswitch
3DD2	X-ray crystallography	2008-11-11	Crystal structure of an RNA aptamer bound to human thrombin
3DS7	X-ray crystallography	2009-02-17	Structure of an RNA-2'-deoxyguanosine complex
3FU2	X-ray crystallography	2009-03-03	Cocrystal structure of a class-I preQ1 riboswitch
3GCA	X-ray crystallography	2009-03-03	The structural basis for recognition of the preQ0 metabolite by an unusually small riboswitch aptamer domain
2JLT	X-ray crystallography	2009-08-18	Crystal structure of an RNA kissing complex
3K1V	X-ray crystallography	2009-10-06	Cocrystal structure of a mutant class-I preQ1 riboswitch
3IRW	X-ray crystallography	2009-11-10	Structure of a c-di-GMP riboswitch from V. cholerae
2RQJ	NMR	2009-11-17	Quadruplex structure of an RNA aptamer against bovine prion protein
3HXO	X-ray crystallography	2009-11-17	Crystal Structure of Von Willebrand Factor (VWF) A1 Domain in Complex with DNA Aptamer ARC1172, an Inhibitor of VWF-Platelet Binding
3HXQ	X-ray crystallography	2009-11-17	Crystal Structure of Von Willebrand Factor (VWF) A1 Domain in Complex with DNA Aptamer ARC1172, an Inhibitor of VWF-Platelet Binding
3IVN	X-ray crystallography	2010-01-19	Structure of the U65C mutant A-riboswitch aptamer from the Bacillus subtilis pbuE operon
3HSB	X-ray crystallography	2010-06-23	Crystal structure of YmaH (Hfq) from Bacillus subtilis in complex with an RNA aptamer
3IQN	X-ray crystallography	2010-08-04	Free-state structural transitions of the SAM-I riboswitch
3IQP	X-ray crystallography	2010-08-04	SAM-I riboswitch from T. tencongensis variant A94G apo form
3IQR	X-ray crystallography	2010-08-04	SAM-I riboswitch from T. tencongensis variant A94G bound with SAM
3MUM	X-ray crystallography	2010-08-25	Crystal Structure of the G20A mutant c-di-GMP riboswith bound to c-di-GMP
3MUR	X-ray crystallography	2010-08-25	Crystal Structure of the C92U mutant c-di-GMP riboswith bound to c-di-GMP
3MUT	X-ray crystallography	2010-08-25	Crystal Structure of the G20A/C92U mutant c-di-GMP riboswith bound to c-di-GMP
3MUV	X-ray crystallography	2010-08-25	Crystal Structure of the G20A/C92U mutant c-di-GMP riboswith bound to c-di-AMP
3MXH	X-ray crystallography	2010-08-25	Native structure of a c-di-GMP riboswitch from V. cholerae
2L1V	NMR	2010-09-01	Solution structure of a preQ1 riboswitch (Class I) aptamer bound to preQ1
3NPN	X-ray crystallography	2010-10-06	Structure of the s-adenosylhomocysteine riboswitch at 3.0A
3NPQ	X-ray crystallography	2010-10-06	Structure of the S-adenosylhomocysteine riboswitch at 2.18 A
3AGV	X-ray crystallography	2010-11-10	Crystal structure of a human IgG-aptamer complex
3KNC	X-ray crystallography	2010-12-08	Crystal structure of the CeNA-RNA hybrid octamer ce(GCGTAGCG):r(CGCUACGC)
2XNZ	X-ray crystallography	2011-04-06	xpt-pbuX C74U Riboswitch from B. subtilis bound to acetoguanamine identified by virtual screening
3Q3Z	X-ray crystallography	2011-05-11	Structure of a c-di-GMP-II riboswitch from C. acetobutylicum bound to c-di-GMP
3Q50	X-ray crystallography	2011-05-18	Structural analysis of a class I PreQ1 riboswitch aptamer in the metabolite-bound state
3Q51	X-ray crystallography	2011-05-18	Structural analysis of a class I PreQ1 riboswitch aptamer in the metabolite-free state.
3PMH	X-ray crystallography	2011-06-01	Mechanism of Sulfotyrosine-Mediated Glycoprotein Ib Interaction with Two Distinct alpha-Thrombin Sites
2RRC	NMR	2011-06-29	Solution Structure of RNA aptamer against AML1 Runt domain
3AHU	X-ray crystallography	2011-07-13	Crystal structure of YmaH (Hfq) from Bacillus subtilis in complex with an RNA aptamer.
3RKF	X-ray crystallography	2011-08-17	Crystal structure of guanine riboswitch C61U/G37A double mutant bound to thio-guanine
2YIE	X-ray crystallography	2011-08-31	Crystal structure of a F. nucleatum FMN riboswitch bound to FMN
2YIF	X-ray crystallography	2011-08-31	Crystal structure of a F. nucleatum FMN riboswitch - Free state
3SD3	X-ray crystallography	2011-09-21	The structure of the tetrahydrofolate riboswitch containing a U25C mutation
3QLP	X-ray crystallography	2011-10-19	X-ray structure of the complex between human alpha thrombin and a modified thrombin binding aptamer (mTBA)
2L5K	NMR	2011-12-07	Solution structure of truncated 23-mer DNA MUC1 aptamer
3UCU	X-ray crystallography	2012-01-04	The c-di-GMP-I riboswitch bound to pGpG
3UCZ	X-ray crystallography	2012-01-04	The c-di-GMP-I riboswitch bound to GpG
3UD3	X-ray crystallography	2012-01-04	The C92U mutant c-di-GMP-I riboswitch bound to pGpA
3UD4	X-ray crystallography	2012-01-04	The C92U mutant c-di-GMP-I riboswitch bound to GpA
3V7E	X-ray crystallography	2012-03-07	Crystal structure of YbxF bound to the SAM-I riboswitch aptamer
4FE5	X-ray crystallography	2012-06-27	Crystal structure of the xpt-pbuX guanine riboswitch aptamer domain in complex with hypoxanthine
3UZS	X-ray crystallography	2012-07-11	Structure of the C13.28 RNA Aptamer Bound to the G Protein-Coupled Receptor Kinase 2-Heterotrimeric G Protein Beta 1 and Gamma 2 Subunit Complex
3UZT	X-ray crystallography	2012-07-11	Structure of the C13.18 RNA Aptamer in Complex with G Protein-Coupled Receptor Kinase 2
4DIH	X-ray crystallography	2012-07-18	X-ray structure of the complex between human alpha thrombin and thrombin binding aptamer in the presence of sodium ions
4DII	X-ray crystallography	2012-07-18	X-ray structure of the complex between human alpha thrombin and thrombin binding aptamer in the presence of potassium ions
4ERJ	X-ray crystallography	2012-07-18	Crystal structure of the lysine riboswitch bound to a 6-aminocaproic acid
4ERL	X-ray crystallography	2012-07-18	Crystal structure of the lysine riboswitch bound to a lysine-glycine dipeptide
4FRG	X-ray crystallography	2012-10-17	Crystal structure of the cobalamin riboswitch aptamer domain
4FRN	X-ray crystallography	2012-10-17	Crystal structure of the cobalamin riboswitch regulatory element
4HQU	X-ray crystallography	2012-11-21	Crystal structure of human PDGF-BB in complex with a modified nucleotide aptamer (SOMAmer SL5)
4HQX	X-ray crystallography	2012-11-21	Crystal structure of human PDGF-BB in complex with a modified nucleotide aptamer (SOMAmer SL4)
4BCU	X-ray crystallography	2013-01-23	Satellite Tobacco Necrosis Virus (STNV) virus like particle in complex with the B3 aptamer
2RSK	NMR	2013-02-13	RNA aptamer against prion protein in complex with the partial binding peptide
4FEJ	X-ray crystallography	2013-02-27	Crystal structure of the A24U mutant xpt-pbuX guanine riboswitch aptamer domain in complex with hypoxanthine
4FEL	X-ray crystallography	2013-02-27	Crystal structure of the U25A/A46G mutant of the xpt-pbuX guanine riboswitch aptamer domain in complex with hypoxanthine
4FEN	X-ray crystallography	2013-02-27	Crystal structure of the A24U/U25A/A46G mutant xpt-pbuX guanine riboswitch aptamer domain in complex with hypoxanthine
4FEO	X-ray crystallography	2013-02-27	Crystal structure of the AU25A/A46G/C74U mutant xpt-pbuX guanine riboswitch aptamer domain in complex with 2,6-diaminopurine
4FEP	X-ray crystallography	2013-02-27	Crystal structure of the A24U/U25A/A46G/C74U mutant xpt-pbuX guanine riboswitch aptamer domain in complex with 2,6-diaminopurine
4KQY	X-ray crystallography	2013-08-07	Bacillus subtilis yitJ S box/SAM-I riboswitch
2M53	NMR	2013-08-28	G-rich VEGF aptamer with LNA modifications
3ZH2	X-ray crystallography	2013-09-25	Structure of Plasmodium falciparum lactate dehydrogenase in complex with a DNA aptamer
4IJE	X-ray crystallography	2013-10-09	Crystal structure of the Zaire ebolavirus VP35 interferon inhibitory domain R312A/K319A/R322A mutant
4IJF	X-ray crystallography	2013-10-09	Crystal structure of the Zaire ebolavirus VP35 interferon inhibitory domain K222A/R225A/K248A/K251A mutant
4I7Y	X-ray crystallography	2013-10-16	Crystal Structure of Human Alpha Thrombin in Complex with a 27-mer Aptamer Bound to Exosite II
4M6D	X-ray crystallography	2013-12-11	Crystal structure of the aptamer minF-lysozyme complex.
2LUN	NMR	2013-12-18	RNA Aptamer for B. anthracis Ribosomal Protein S8
4M4O	X-ray crystallography	2013-12-18	Crystal structure of the aptamer minE-lysozyme complex
4LZ1	X-ray crystallography	2014-01-08	X-ray structure of the complex between human thrombin and the TBA deletion mutant lacking thymine 12 nucleobase
4LZ4	X-ray crystallography	2014-01-08	X-ray structure of the complex between human thrombin and the TBA deletion mutant lacking thymine 3 nucleobase
4NI7	X-ray crystallography	2014-01-22	Crystal structure of human interleukin 6 in complex with a modified nucleotide aptamer (SOMAMER SL1025)
4NI9	X-ray crystallography	2014-01-22	Crystal structure of human interleukin 6 in complex with a modified nucleotide aptamer (SOMAMER SL1025), FORM 2
2LYG	NMR	2014-01-29	Fuc_TBA
4MS9	X-ray crystallography	2014-02-12	Native RNA-10mer Structure: CCGGCGCCGG
4MSB	X-ray crystallography	2014-02-12	RNA 10mer duplex with two 2'-5'-linkages
4MSR	X-ray crystallography	2014-02-12	RNA 10mer duplex with six 2'-5'-linkages
4LVV	X-ray crystallography	2014-03-19	Structure of the THF riboswitch
4LVW	X-ray crystallography	2014-03-19	Structure of the THF riboswitch bound to 7-deazaguanine
4LVX	X-ray crystallography	2014-03-19	Structure of the THF riboswitch bound to tetrahydrobiopterin
4LVY	X-ray crystallography	2014-03-19	Structure of the THF riboswitch bound to pemetrexed
4LVZ	X-ray crystallography	2014-03-19	Structure of the THF riboswitch bound to 2,6-diaminopurine
4LW0	X-ray crystallography	2014-03-19	Structure of the THF riboswitch bound to adenine
2RU7	NMR	2014-05-21	Refined structure of RNA aptamer in complex with the partial binding peptide of prion protein
4L81	X-ray crystallography	2014-05-28	Structure of the SAM-I/IV riboswitch (env87(deltaU92, deltaG93))
4OQU	X-ray crystallography	2014-06-04	Structure of the SAM-I/IV riboswitch (env87(deltaU92))
4KZD	X-ray crystallography	2014-06-18	Crystal structure of an RNA aptamer in complex with fluorophore and Fab
4KZE	X-ray crystallography	2014-06-18	Crystal structure of an RNA aptamer in complex with Fab
4Q9Q	X-ray crystallography	2014-06-18	Crystal structure of an RNA aptamer bound to bromo-ligand analog in complex with Fab
4Q9R	X-ray crystallography	2014-06-18	Crystal structure of an RNA aptamer bound to trifluoroethyl-ligand analog in complex with Fab
4LX5	X-ray crystallography	2014-07-16	X-ray crystal structure of the M6" riboswitch aptamer bound to pyrimido[4,5-d]pyrimidine-2,4-diamine (PPDA)
4LX6	X-ray crystallography	2014-07-16	X-ray crystal structure of the M6C" riboswitch aptamer bound to 2-aminopyrimido[4,5-d]pyrimidin-4(3H)-one (PPAO)
4TS0	X-ray crystallography	2014-07-23	Crystal structure of the Spinach RNA aptamer in complex with DFHBI, barium ions
4TS2	X-ray crystallography	2014-07-23	Crystal structure of the Spinach RNA aptamer in complex with DFHBI, magnesium ions
4PDB	X-ray crystallography	2014-09-03	Crystal structure of bacillus anthracis ribosomal protein S8 in complex with an RNA aptamer
2MKM	NMR	2014-11-19	G-triplex structure and formation propensity
2MKO	NMR	2014-11-19	G-triplex structure and formation propensity
4QCI	X-ray crystallography	2015-03-11	PDGF-B blocking antibody bound to PDGF-BB
4Y1I	X-ray crystallography	2015-04-08	Lactococcus lactis yybP-ykoY Mn riboswitch bound to Mn2+
4Y1J	X-ray crystallography	2015-04-08	Lactococcus lactis yybP-ykoY Mn riboswitch A41U binding site mutant in presence of Mn2+
4Y1M	X-ray crystallography	2015-04-08	An Escherichia coli yybP-ykoY Mn riboswitch in the Mn2+-free state
4YAZ	X-ray crystallography	2015-04-15	3',3'-cGAMP riboswitch bound with 3',3'-cGAMP
4YB0	X-ray crystallography	2015-04-15	3',3'-cGAMP riboswitch bound with c-di-GMP
4YB1	X-ray crystallography	2015-04-15	20A Mutant c-di-GMP Vc2 Riboswitch bound with 3',3'-cGAMP
4R8I	X-ray crystallography	2015-04-29	High Resolution Structure of a Mirror-Image RNA Oligonucleotide Aptamer in Complex with the Chemokine CCL2
4WB2	X-ray crystallography	2015-05-06	Crystal structure of the mirror-image L-RNA/L-DNA aptamer NOX-D20 in complex with mouse C5a complement anaphylatoxin
4WB3	X-ray crystallography	2015-05-06	Crystal structure of the mirror-image L-RNA/L-DNA aptamer NOX-D20 in complex with mouse C5a-desArg complement anaphylatoxin
4XNR	X-ray crystallography	2015-05-06	Vibrio Vulnificus Adenine Riboswitch Aptamer Domain, Synthesized by Position-selective Labeling of RNA (PLOR), in Complex with Adenine
4ZBN	X-ray crystallography	2015-06-10	Non-helical DNA Triplex Forms a Unique Aptamer Scaffold for High Affinity Recognition of Nerve Growth Factor
4RZD	X-ray crystallography	2015-07-01	Crystal Structure of a PreQ1 Riboswitch
5D3G	X-ray crystallography	2015-09-30	Structure of HIV-1 Reverse Transcriptase Bound to a Novel 38-mer Hairpin Template-Primer DNA Aptamer
5CMX	X-ray crystallography	2016-01-13	X-ray structure of the complex between human alpha thrombin and a duplex/quadruplex 31-mer DNA aptamer
5HLF	X-ray crystallography	2016-02-10	Structure of HIV-1 reverse transcriptase in complex with a 38-mer hairpin template-primer DNA aptamer and an alpha-carboxyphosphonate inhibitor
5F5F	X-ray crystallography	2016-04-06	X-ray structure of Roquin ROQ domain in complex with a Selex-derived hexa-loop RNA motif
5F5H	X-ray crystallography	2016-04-06	X-ray structure of Roquin ROQ domain in complex with Ox40 hexa-loop RNA motif
5HRT	X-ray crystallography	2016-04-06	Crystal structure of mouse autotaxin in complex with a DNA aptamer
5HP1	X-ray crystallography	2016-06-01	Structure of HIV-1 reverse transcriptase in complex with a DNA aptamer and foscarnet, a pyrophosphate analog
5HRO	X-ray crystallography	2016-06-01	Structure of HIV-1 reverse transcriptase in complex with a DNA aptamer and an alpha-carboxy nucleoside phosphonate inhibitor (alpha-CNP)
5I3U	X-ray crystallography	2016-06-01	Structure of HIV-1 reverse transcriptase N-site complex; catalytic incorporation of AZTMP to a DNA aptamer in crystal
5I42	X-ray crystallography	2016-06-01	Structure of HIV-1 Reverse Transcriptase in complex with a DNA aptamer, AZTTP, and CA(2+) ion
5DO4	X-ray crystallography	2016-09-14	Thrombin-RNA aptamer complex
5HRU	X-ray crystallography	2016-10-19	Crystal structure of Plasmodium vivax LDH in complex with a DNA aptamer called pL1
5HS4	X-ray crystallography	2016-10-19	Plasmdoium Vivax Lactate dehydrogenase
5HTO	X-ray crystallography	2016-10-19	Crystal structure of Plasmodium Vivax LDH in complex with a DNA aptamer called pL1 (tetrameric LDH in an asymmetric unit)
5EGO	X-ray crystallography	2016-11-09	HOXB13-MEIS1 heterodimer bound to methylated DNA
5E54	X-ray crystallography	2016-11-23	Two apo structures of the adenine riboswitch aptamer domain determined using an X-ray free electron laser
5SWD	X-ray crystallography	2016-11-23	Structure of the adenine riboswitch aptamer domain in an intermediate-bound state
5SWE	X-ray crystallography	2016-11-23	Ligand-bound structure of adenine riboswitch aptamer domain converted in crystal from its ligand-free state using ligand mixing serial femtosecond crystallography
5EW1	X-ray crystallography	2016-11-30	Human thrombin sandwiched between two DNA aptamers: HD22 and HD1-deltaT3
5EW2	X-ray crystallography	2016-11-30	Human thrombin sandwiched between two DNA aptamers: HD22 and HD1-deltaT12
5LWJ	NMR	2016-12-14	Solution NMR structure of the GTP binding Class II RNA aptamer-ligand-complex containing a protonated adenine nucleotide with a highly shifted pKa.
5KPY	X-ray crystallography	2017-01-11	Structure of a 5-hydroxytryptophan aptamer
5MJV	X-ray crystallography	2017-01-11	Rebuild and re-refined model for Human Parechovirus 1
5T83	X-ray crystallography	2017-01-11	Structure of a guanidine-I riboswitch from S. acidophilus
5HOD	X-ray crystallography	2017-02-01	Structure of LHX4 transcription factor complexed with DNA
5MJX	NMR	2017-02-01	2'F-ANA/DNA Chimeric TBA Quadruplex structure
5EF6	X-ray crystallography	2017-02-08	Structure of HOXB13 complex with methylated DNA
5LUX	X-ray crystallography	2017-05-17	Homeobox transcription factor CDX1 bound to methylated DNA
5V3F	X-ray crystallography	2017-05-24	Co-crystal structure of the fluorogenic RNA Mango
5LTY	X-ray crystallography	2017-05-31	Homeobox transcription factor CDX2 bound to methylated DNA
5VJ9	X-ray crystallography	2017-06-28	Guanidine-II riboswitch P2 hairpin dimer from Pseudomonas aeruginosa
5VJB	X-ray crystallography	2017-06-28	Guanidine-II riboswitch P2 hairpin dimer with 5-bromoU substitution from Pseudomonas aeruginosa
5KH8	NMR	2017-07-19	Solution structures of the apo state fluoride riboswitch
5BJO	X-ray crystallography	2017-09-27	Crystal structure of the Corn RNA aptamer in complex with DFHO, site-specific 5-iodo-U
5BJP	X-ray crystallography	2017-09-27	Crystal structure of the Corn RNA aptamer in complex with DFHO, iridium hexammine soak
5OB3	X-ray crystallography	2017-10-04	iSpinach aptamer
5UC6	X-ray crystallography	2017-10-11	Structural insights into IL-1 alpha recognition by a naphthyl-modified aptamer that mimics IL-1RI Domain III
6EO7	X-ray crystallography	2017-10-18	X-ray structure of the complex between human alpha-thrombin and modified 15-mer DNA aptamer containing 5-(3-(acetamide-N-yl)-1-propen-1-yl)-2'-deoxyuridine residue
6EO6	X-ray crystallography	2017-10-25	X-ray structure of the complex between human alpha-thrombin and modified 15-mer DNA aptamer containing 5-(3-(2-(1H-indol-3-yl)acetamide-N-yl)-1-propen-1-yl)-2'-deoxyuridine residue
5XJZ	X-ray crystallography	2017-12-06	Structure of DNA1-Ag complex
5XK0	X-ray crystallography	2017-12-06	Structure of 8-mer DNA2
5XK1	X-ray crystallography	2017-12-06	Structure of 8-mer DNA3
6B14	X-ray crystallography	2017-12-27	Crystal structure of Spinach RNA aptamer in complex with Fab BL3-6S97N
6B3K	X-ray crystallography	2017-12-27	Crystal structure of mutant Spinach RNA aptamer in complex with Fab BL3-6
5XN0	X-ray crystallography	2018-02-07	HIV-1 reverse transcriptase Q151M:DNA binary complex
5XN1	X-ray crystallography	2018-02-07	HIV-1 reverse transcriptase Q151M:DNA:entecavir-triphosphate ternary complex
5XN2	X-ray crystallography	2018-02-07	HIV-1 reverse transcriptase Q151M:DNA:dGTP ternary complex
5UZA	X-ray crystallography	2018-02-28	Adenine riboswitch aptamer domain labelled with iodo-uridine by position-selective labelling of RNA (PLOR)
5VOF	X-ray crystallography	2018-06-13	DesGla-XaS195A Bound to Aptamer 11F7t and Rivaroxaban
5VOE	X-ray crystallography	2018-06-20	DesGla-XaS195A Bound to Aptamer 11F7t
6CK4	X-ray crystallography	2018-06-20	G96A mutant of the PRPP riboswitch from T. mathranii bound to ppGpp
6CK5	X-ray crystallography	2018-06-20	PRPP riboswitch from T. mathranii bound to PRPP
6CF2	X-ray crystallography	2018-07-25	Crystal structure of HIV-1 Rev (residues 1-93)-RNA aptamer complex
6C63	X-ray crystallography	2018-08-08	Crystal Structure of the Mango-II Fluorescent Aptamer Bound to TO1-Biotin
6C64	X-ray crystallography	2018-08-08	Crystal Structure of the Mango-II Fluorescent Aptamer Bound to TO3-Biotin
6C65	X-ray crystallography	2018-08-08	Crystal Structure of the Mango-II-A22U Fluorescent Aptamer Bound to TO1-Biotin
6CXZ	X-ray crystallography	2018-08-29	RNA octamer containing 2'-F, 4'-Calpha-Me U.
6CY0	X-ray crystallography	2018-08-29	RNA octamer containing 2'-F, 4'-Cbeta-OMe U.
6CY2	X-ray crystallography	2018-08-29	RNA octamer containing 2'-OMe, 4'Calpha-OMe U.
6CY4	X-ray crystallography	2018-08-29	RNA octamer containing 2'-OMe, 4'- Cbeta-OMe U.
6GN7	X-ray crystallography	2018-10-17	X-ray structure of the complex between human alpha thrombin and NU172, a duplex/quadruplex 26-mer DNA aptamer, in the presence of sodium ions.
6EVV	X-ray crystallography	2018-10-24	X-ray structure of the complex between human alpha thrombin and NU172, a duplex/quadruplex 26-mer DNA aptamer, in the presence of potassium ions.
6BHJ	X-ray crystallography	2018-10-31	Structure of HIV-1 Reverse Transcriptase Bound to a 38-mer Hairpin Template-Primer RNA-DNA Aptamer
6DB8	X-ray crystallography	2018-11-14	Structural basis for promiscuous binding and activation of fluorogenic dyes by DIR2s RNA aptamer
6DB9	X-ray crystallography	2018-11-14	Structural basis for promiscuous binding and activation of fluorogenic dyes by DIR2s RNA aptamer
6J2W	NMR	2019-02-27	The structure of OBA3-OTA complex
6MIG	X-ray crystallography	2019-02-27	Crystal structure of host-guest complex with PB hachimoji DNA
6MIH	X-ray crystallography	2019-02-27	Crystal structure of host-guest complex with PC hachimoji DNA
6MIK	X-ray crystallography	2019-02-27	Crystal structure of host-guest complex with PP hachimoji DNA
6IA2	X-ray crystallography	2019-03-27	Crystal structure of a self-complementary RNA duplex recognized by Com
6E8S	X-ray crystallography	2019-04-17	Structure of the iMango-III aptamer bound to TO1-Biotin
6E8T	X-ray crystallography	2019-04-17	Structure of the Mango-III (A10U) aptamer bound to TO1-Biotin
6E8U	X-ray crystallography	2019-04-17	Structure of the Mango-III (A10U) aptamer bound to TO1-Biotin
6GQE	X-ray crystallography	2019-04-24	X-ray structure of KH1-2 domain of IMP3
6DJA	X-ray crystallography	2019-05-29	Zn-dependent 5/B/6 metallo-beta-lactamase from bacillus cereus
6DVK	X-ray crystallography	2019-06-26	Computationally designed mini tetraloop-tetraloop receptor by the RNAMake program - construct 6 (miniTTR 6)
6GZK	NMR	2019-07-17	Solution NMR structure of the tetramethylrhodamine (TMR) aptamer 3 in complex with 5-TAMRA
6GZR	NMR	2019-07-17	Solution NMR structure of the tetramethylrhodamine (TMR) aptamer 3 in complex with 5-TAMRA
6E80	X-ray crystallography	2019-07-31	Crystal structure of the Corn aptamer in unliganded state
6E81	X-ray crystallography	2019-07-31	Crystal structure of the Corn aptamer in complex with ThT
6E82	X-ray crystallography	2019-07-31	Crystal structure of the Corn aptamer mutant A14U in complex with ThT
6E84	X-ray crystallography	2019-07-31	Crystal structure of the Corn aptamer in complex with TO
6PQ7	X-ray crystallography	2019-07-31	Structure of the iMango-III fluorescent aptamer at room temperature.
6N2V	X-ray crystallography	2019-10-02	Manganese riboswitch from Xanthmonas oryzae bound to Mn(II)
6ROL	X-ray crystallography	2019-10-16	Structure of IMP2 KH34 domains
6P2H	X-ray crystallography	2019-10-23	Structural basis for 2'-deoxyguanosine recognition by the 2'-dG-II class of riboswitches
6Q57	X-ray crystallography	2019-12-18	X-ray crystal structure of the tetrahydrofolate riboswitch aptamer bound to 5-deazatetrahydropterin
6SY4	X-ray crystallography	2020-02-05	TetR in complex with the TetR-binding RNA-aptamer K1
6SY6	X-ray crystallography	2020-02-05	TetR in complex with the TetR-binding RNA-aptamer K2
6U81	X-ray crystallography	2020-02-19	Crystal Structure of the Double Homeodomain of DUX4 in Complex with a DNA aptamer
6U82	X-ray crystallography	2020-02-19	Crystal Structure of the Double Homeodomain of DUX4 in Complex with a DNA aptamer containing bulge and loop
6K84	NMR	2020-04-01	Structure of anti-prion RNA aptamer
6V9B	X-ray crystallography	2020-05-20	Co-crystal structure of the fluorogenic Mango-IV homodimer bound to TO1-Biotin
6V9D	X-ray crystallography	2020-05-20	Co-crystal structure of the fluorogenic Mango-IV homodimer bound to TO1-Biotin
6RTI	X-ray crystallography	2020-06-10	X-ray structure of human glutamate carboxypeptidase II (GCPII) in complex with aptamer A9g
6VMY	X-ray crystallography	2020-06-10	Structure of the B. subtilis cobalamin riboswitch
6VUH	X-ray crystallography	2020-06-24	APO PreQ1 riboswitch aptamer grown in Mn2+
6VUI	X-ray crystallography	2020-06-24	Metabolite-bound PreQ1 riboswitch with Mn2+
6WLJ	Cryo-electron microscopy	2020-07-08	ATP-TTR-3 with AMP models, 9.6 Angstrom resolution
6WLK	Cryo-electron microscopy	2020-07-08	Apo ATP-TTR-3 models, 10.0 Angstrom resolution
6WLL	Cryo-electron microscopy	2020-07-08	Apo F. nucleatum glycine riboswitch models, 10.0 Angstrom resolution
6WLM	Cryo-electron microscopy	2020-07-08	F. nucleatum glycine riboswitch with glycine models, 7.4 Angstrom resolution
6WLN	Cryo-electron microscopy	2020-07-08	hc16 ligase product models, 10.0 Angstrom resolution
6WLO	Cryo-electron microscopy	2020-07-08	hc16 ligase models, 11.0 Angstrom resolution
6WLQ	Cryo-electron microscopy	2020-07-08	Apo SAM-IV riboswitch models, 4.7 Angstrom resolution
6WLR	Cryo-electron microscopy	2020-07-08	SAM-IV riboswitch with SAM models, 4.8 Angstrom resolution
6WLS	Cryo-electron microscopy	2020-07-08	Tetrahymena ribozyme models, 6.8 Angstrom resolution
6WLT	Cryo-electron microscopy	2020-07-08	Apo V. cholerae glycine riboswitch models, 4.8 Angstrom resolution
6WLU	Cryo-electron microscopy	2020-07-08	V. cholerae glycine riboswitch with glycine models, 5.7 Angstrom resolution
6TXR	X-ray crystallography	2020-07-15	Structural insights into cubane-modified aptamer recognition of a malaria biomarker
6SJD	X-ray crystallography	2020-07-22	ZC3H12B-ribonuclease domain bound to RNA
6UBU	X-ray crystallography	2020-07-22	1.60 A resolution structure of the guanine riboswitch bound to guanine
6UC7	X-ray crystallography	2020-07-22	Structure of guanine riboswitch bound to N2-acetyl guanine
6UC8	X-ray crystallography	2020-07-22	Guanine riboswitch bound to 8-aminoguanine
6UC9	X-ray crystallography	2020-07-22	Guanine riboswitch bound to O6-cyclohexylmethyl guanine
6WJR	X-ray crystallography	2020-09-02	Apo structure of the FMN riboswitch aptamer domain in the presence of sulfate
6WJS	X-ray crystallography	2020-09-02	Apo structure of the FMN riboswitch aptamer domain in the presence of phosphate
6SW8	X-ray crystallography	2020-10-07	Crystal structure of the NS1 (H7N1) RNA-binding domain
6SX0	X-ray crystallography	2020-10-07	Specific dsRNA recognition by wild type H7N1 NS1 RNA-binding domain
6SX2	X-ray crystallography	2020-10-07	dsRNA recognition by R38AK41A mutant of H7N1 NS1 RNA Binding Domain
6ZLC	X-ray crystallography	2020-10-07	Non-specific dsRNA recognition by wildtype H7N1 RNA-binding domain
6UP0	X-ray crystallography	2020-10-21	Structure of the Mango-III fluorescent aptamer bound to YO3-Biotin
6VWT	X-ray crystallography	2020-11-11	Transitional unit cell 1 of adenine riboswitch aptamer crystal phase transition upon ligand binding
6VWV	X-ray crystallography	2020-11-11	Transitional unit cell 2 of adenine riboswitch aptamer crystal phase transition upon ligand binding
7D7V	X-ray crystallography	2020-11-25	Crystal Structure of the Domain1 of NAD+ Riboswitch with nicotinamide adenine dinucleotide (NAD+) and U1A protein
7D7W	X-ray crystallography	2020-11-25	Crystal Structure of the Domain1 of NAD+ Riboswitch with nicotinamide adenine dinucleotide (NAD+)
7D7X	X-ray crystallography	2020-11-25	Crystal Structure of the Domain1 of NAD+ Riboswitch with adenosine diphosphate (ADP)
7D7Y	X-ray crystallography	2020-11-25	Crystal Structure of the Domain1 of NAD+ Riboswitch with adenosine triphosphate (ATP)
7D7Z	X-ray crystallography	2020-11-25	Crystal Structure of the Domain1 of NAD+ Riboswitch with nicotinamide adenine dinucleotide (NAD+), soaked in Mn2+
7D81	X-ray crystallography	2020-11-25	Crystal Structure of the Domain2 of NAD+ Riboswitch with nicotinamide adenine dinucleotide (NAD+)
7D82	X-ray crystallography	2020-11-25	Crystal Structure of the Domain2 of NAD+ Riboswitch with nicotinamide adenine dinucleotide (NAD+), soaked in Mn2+
7JTN	X-ray crystallography	2020-12-09	Human Complement Factor B Inhibited by a Slow Off-Rate Modified Aptamer of 29 Bases
7JTQ	X-ray crystallography	2020-12-09	Human Complement Factor B Inhibited by a Slow Off-Rate Modified Aptamer of 31 Bases
6Z8V	X-ray crystallography	2021-01-27	X-ray structure of the complex between human alpha thrombin and a thrombin binding aptamer variant (TBA-3L), which contains 1-beta-D-lactopyranosyl residue in the side chain of Thy3 at N3.
6Z8W	X-ray crystallography	2021-01-27	X-ray structure of the complex between human alpha thrombin and a thrombin binding aptamer variant (TBA-3G), which contains 1-beta-D-glucopyranosyl residue in the side chain of Thy3 at N3.
6Z8X	X-ray crystallography	2021-01-27	X-ray structure of the complex between human alpha thrombin and a thrombin binding aptamer variant (TBA-3Leu), which contains leucyl amide in the side chain of Thy3 at N3.
6VRP	X-ray crystallography	2021-02-10	Reverse Transcriptase Diabody with R83T Mutation
6VUG	X-ray crystallography	2021-02-17	Diabody bound to a Reverse Transcriptase Aptamer Complex
6VUN	X-ray crystallography	2021-02-17	Reverse Transcriptase Diabody with R83C Mutation
6VUO	X-ray crystallography	2021-02-17	Reverse Transcriptase Diabody with S82bC/R83T Mutation
6VUP	X-ray crystallography	2021-02-17	Reverse Transcriptase Diabody with R83T/E85C Mutations
7KD1	X-ray crystallography	2021-03-03	Apo structure of the THF riboswitch aptamer domain
7KBM	X-ray crystallography	2021-03-10	Reverse Transcriptase Diabody with R83C Mutation Crystallized in C2
7KBO	X-ray crystallography	2021-03-10	Reverse Transcriptase Diabody with S82bC, R83T Mutations Crystallized in C2
7KBP	X-ray crystallography	2021-03-10	Herceptin Diabody with R83T, E85C Mutations
7NTU	X-ray crystallography	2021-04-28	X-ray structure of the complex between human alpha thrombin and two duplex/quadruplex aptamers: NU172 and HD22_27mer
7L0Z	X-ray crystallography	2021-05-26	Spinach variant bound to DFHBI-1T
7E5P	NMR	2021-06-16	Aptamer enhancing peroxidase activity of myoglobin
7OA3	X-ray crystallography	2021-06-16	Crystal structure of Chili RNA aptamer in complex with DMHBO+ (Iridium hexammine co-crystallized form)
7OAV	X-ray crystallography	2021-06-16	Crystal structure of Chili RNA aptamer in complex with DMHBO+ (Iridium III hexammine soaking crystal form)
7OAW	X-ray crystallography	2021-06-16	Crystal structure of the Chili RNA aptamer in complex with DMHBI+
7OAX	X-ray crystallography	2021-06-16	Crystal structure of the Chili RNA aptamer in complex with DMHBO+
7F49	X-ray crystallography	2021-07-07	von Willebrand factor (VWF) A1 domain with BT-100 aptamer RNA
7D31	X-ray crystallography	2021-09-22	The TBA-Pb2+ complex in P41212 space group
7D32	X-ray crystallography	2021-09-22	The TBA-Pb2+ complex in P41212 space group
7D33	X-ray crystallography	2021-09-22	The Pb2+ complexed structure of TBA G8C mutant
6TBT	X-ray crystallography	2021-10-13	Crystal structure of the BCL6 BTB domain in complex with an Apt48 peptide
6TCJ	X-ray crystallography	2021-10-13	Crystal structure of the BCL6 BTB domain in complex with a hybrid BTB-binding (HBP) peptide
7MK1	X-ray crystallography	2021-11-03	Structure of a protein-modified aptamer complex
7E9E	X-ray crystallography	2021-11-17	Crystal structure of a class I PreQ1 riboswitch aptamer (ab13-14) complexed with a cognate ligand-derived photoaffinity probe
7E9I	X-ray crystallography	2021-11-17	Crystal structure of a class I PreQ1 riboswitch aptamer (wild-type) complexed with a cognate ligand-derived photoaffinity probe
7EOG	X-ray crystallography	2021-11-24	Crystal structure of the Pepper aptamer in complex with HBC, iridium hexammine soak
7EOH	X-ray crystallography	2021-11-24	Crystal structure of the Pepper aptamer in complex with HBC
7EOI	X-ray crystallography	2021-11-24	Crystal structure of the Pepper aptamer in complex with HBC, manganese soak
7EOJ	X-ray crystallography	2021-11-24	Crystal structure of the Pepper aptamer in complex with HBC, cesium soak
7EOK	X-ray crystallography	2021-11-24	Crystal structure of the Pepper aptamer in complex with HBC485
7EOL	X-ray crystallography	2021-11-24	Crystal structure of the Pepper aptamer in complex with HBC497
7EOM	X-ray crystallography	2021-11-24	Crystal structure of the Pepper aptamer in complex with HBC508
7EON	X-ray crystallography	2021-11-24	Crystal structure of the Pepper aptamer in complex with HBC514
7EOO	X-ray crystallography	2021-11-24	Crystal structure of the Pepper aptamer in complex with HBC525
7EOP	X-ray crystallography	2021-11-24	Crystal structure of the Pepper aptamer in complex with HBC620
7QB3	NMR	2021-12-01	Solution structure of a lanthanide-binding DNA aptamer
7OXQ	X-ray crystallography	2021-12-08	Crystal structure of HIV-1 reverse transcriptase with a double stranded DNA in complex with fragment 048 at the transient P-pocket.
7OZ2	X-ray crystallography	2021-12-08	Crystal structure of HIV-1 reverse transcriptase with a double stranded DNA showing a transient P-pocket
7OZ5	X-ray crystallography	2021-12-08	Crystal structure of HIV-1 reverse transcriptase with a double stranded DNA in complex with fragment 166 at the transient P-pocket.
7OZW	Cryo-electron microscopy	2021-12-08	Cryo-EM structure of HIV-1 reverse transcriptase with a DNA aptamer in complex with fragment 166 at the transient P-pocket
7P15	Cryo-electron microscopy	2021-12-08	Cryo-EM structure of HIV-1 reverse transcriptase with a DNA aptamer in complex with fragment F04 at the transient P-pocket
6XKN	X-ray crystallography	2021-12-29	Class III PreQ1 riboswitch mutant A52G
6XKO	X-ray crystallography	2021-12-29	Class III PreQ1 riboswitch mutant A84G
7REX	X-ray crystallography	2021-12-29	PreQ1-1 (type-1) riboswitch in complex with tandem stacked metabolites
7MLW	X-ray crystallography	2022-01-12	Burkholderia sp. TJI49 Guanidine-I riboswitch
7KVT	X-ray crystallography	2022-01-19	Crystal structure of Squash RNA aptamer in complex with DFHBI-1T with iridium (III) ions
7KVU	X-ray crystallography	2022-01-19	Crystal structure of Squash RNA aptamer in complex with DFHBI-1T
7KVV	X-ray crystallography	2022-01-19	Crystal structure of Squash RNA aptamer in complex with DFHBI-1T
7W9N	NMR	2022-01-19	THE STRUCTURE OF OBA33-OTA COMPLEX
7V5N	X-ray crystallography	2022-02-02	Crystal structure of Fab fragment of bevacizumab bound to DNA aptamer
7LRI	X-ray crystallography	2022-02-23	Structure of HIV-1 Reverse Transcriptase in complex with DNA, dTTP, and CA(2+) ion
7LRM	X-ray crystallography	2022-02-23	Structure of HIV-1 Reverse Transcriptase in complex with DNA, dCTP, and CA(2+) ion
7LRX	X-ray crystallography	2022-02-23	Structure of HIV-1 Reverse Transcriptase in complex with DNA, L-dCTP, and CA(2+) ion
7LRY	X-ray crystallography	2022-02-23	Structure of HIV-1 Reverse Transcriptase in complex with DNA, (-)FTC-TP, and CA(2+) ion
7LSK	X-ray crystallography	2022-02-23	Structure of HIV-1 Reverse Transcriptase in complex with DNA, L-dTTP, and CA(2+) ion
7X7G	X-ray crystallography	2022-04-20	Crystal structure of a dimeric interlocked parallel G-quadruplex
7XDH	X-ray crystallography	2022-04-20	Crystal structure of a dimeric interlocked parallel G-quadruplex
7EZW	X-ray crystallography	2022-06-08	Cyclic Peptide that Interacts with the eIF4E Capped-mRNA Binding Site
7F07	X-ray crystallography	2022-06-08	Autonomous VH domain that interacts with eIF4E at the Capped mRNA Binding site.
7SZU	X-ray crystallography	2022-07-06	Crystal structure of Pepper RNA aptamer in complex with HBC ligand and Fab BL3-6
7RWR	NMR	2022-07-20	An RNA aptamer that decreases flavin redox potential
7Z24	Cryo-electron microscopy	2022-07-20	Cryo-EM structure of HIV-1 reverse transcriptase with a DNA aptamer in complex with nevirapine
7Z29	Cryo-electron microscopy	2022-07-20	Cryo-EM structure of NNRTI resistant M184I/E138K mutant HIV-1 reverse transcriptase with a DNA aptamer in complex with nevirapine
7Z2D	Cryo-electron microscopy	2022-07-20	Cryo-EM structure of HIV-1 reverse transcriptase with a DNA aptamer in complex with rilpivirine
7Z2E	Cryo-electron microscopy	2022-07-20	Cryo-EM structure of NNRTI resistant M184I/E138K mutant HIV-1 reverse transcriptase with a DNA aptamer in complex with rilpivirine
7Z2G	Cryo-electron microscopy	2022-07-20	Cryo-EM structure of HIV-1 reverse transcriptase with a DNA aptamer in complex with doravirine
7Z2H	Cryo-electron microscopy	2022-07-20	Cryo-EM structure of NNRTI resistant M184I/E138K mutant HIV-1 reverse transcriptase with a DNA aptamer in complex with doravirine
7QY4	X-ray crystallography	2022-08-03	As isolated MSOX movie series dataset 5 (2 MGy) of the copper nitrite reductase from Bradyrhizobium sp. ORS 375 (two-domain)
7ZQS	Cryo-electron microscopy	2022-08-17	Cryo-EM Structure of Human Transferrin Receptor 1 bound to DNA Aptamer
7U0Y	X-ray crystallography	2022-08-31	Crystal structure of Pepper RNA aptamer in complex with HBC599 ligand and Fab BL3-6
7V3T	NMR	2022-09-28	Solution structure of thrombin binding aptamer G-quadruplex bound a self-adaptive small molecule with rotated ligands
7YQ3	Cryo-electron microscopy	2022-11-09	Human insulin receptor bound with A43 DNA aptamer and insulin
7YQ4	Cryo-electron microscopy	2022-11-09	Human insulin receptor bound with A62 DNA aptamer and insulin - locally refined
7YQ5	Cryo-electron microscopy	2022-11-09	Human insulin receptor bound with A62 DNA aptamer and insulin
7YQ6	Cryo-electron microscopy	2022-11-09	Human insulin receptor bound with A62 DNA aptamer
8GUY	Cryo-electron microscopy	2022-11-09	Human insulin receptor bound with two insulin molecules
7ZKL	X-ray crystallography	2022-11-30	X-ray structure of the complex between human alpha thrombin and a pseudo-cyclic thrombin binding aptamer (TBA-NNp/DDp) - Crystal form alpha
7ZKM	X-ray crystallography	2022-11-30	X-ray structure of the complex between human alpha thrombin and a pseudo-cyclic thrombin binding aptamer (TBA-NNp/DDp) - Crystal form beta
7ZKN	X-ray crystallography	2022-11-30	X-ray structure of the complex between human alpha thrombin and a pseudo-cyclic thrombin binding aptamer (TBA-NNp/DDp) - Crystal form gamma
7ZKO	X-ray crystallography	2022-11-30	X-ray structure of the complex between human alpha thrombin and a pseudo-cyclic thrombin binding aptamer (TBA-NNp/DDp) - Crystal form delta
8D28	X-ray crystallography	2022-11-30	Crystal structure of theophylline aptamer in complex with theophylline
8D29	X-ray crystallography	2022-11-30	Crystal structure of theophylline aptamer - apo form
8D2A	X-ray crystallography	2022-11-30	Crystal structure of theophylline aptamer in complex with TAL3
8D2B	X-ray crystallography	2022-11-30	Crystal structure of theophylline aptamer in complex with TAL2
8D5L	X-ray crystallography	2022-11-30	Crystal structure of theophylline aptamer in complex with TAL1
8D5O	X-ray crystallography	2022-11-30	Crystal structure of theophylline aptamer in complex with TAL4
8DK7	X-ray crystallography	2022-11-30	Crystal structure of theophylline aptamer soaked with TAL2
7XH9	X-ray crystallography	2023-02-15	Crystal structure of a dimeric interlocked parallel G-quadruplex
7XHD	X-ray crystallography	2023-02-15	Crystal structure of a dimeric interlocked parallel G-quadruplex
7XIE	X-ray crystallography	2023-02-15	Crystal structure of a dimeric interlocked parallel G-quadruplex
8FB3	X-ray crystallography	2023-02-22	PreQ1-1 (type-1) riboswitch with stacked metabolites and a C10-G34 base pair in the expression platform
8HB1	X-ray crystallography	2023-03-22	Crystal structure of NAD-II riboswitch (two strands) with NMN
8HB3	X-ray crystallography	2023-03-22	Crystal structure of NAD-II riboswitch (two strands) with NR
8HB8	X-ray crystallography	2023-03-22	Crystal structure of NAD-II riboswitch (single strand) with NMN
8HBA	X-ray crystallography	2023-03-22	Crystal structure of NAD-II riboswitch (single strand) with NAD
8I3Z	X-ray crystallography	2023-03-22	Crystal structure of NAD-II riboswitch (two strands) with NMN at 1.67 angstrom
7ZJ4	Cryo-electron microscopy	2023-04-19	Ligand bound state of a brocolli-pepper aptamer FRET tile
7ZJ5	Cryo-electron microscopy	2023-04-19	Unbound state of a brocolli-pepper aptamer FRET tile.
8FHV	X-ray crystallography	2023-05-10	Structure of Lettuce aptamer bound to DFHBI-1T with thallium I ions
8FHX	X-ray crystallography	2023-05-10	Structure of Lettuce aptamer bound to DFHBI-1T
8FHZ	X-ray crystallography	2023-05-10	Structure of Lettuce aptamer bound to DFHO
8FI0	X-ray crystallography	2023-05-10	Structure of Lettuce aptamer bound to DFAME
8FI1	X-ray crystallography	2023-05-10	Structure of Lettuce C20G bound to DFHO
8FI2	X-ray crystallography	2023-05-10	Structure of Lettuce C20T bound to DFHBI-1T
8FI7	X-ray crystallography	2023-05-10	Structure of Lettuce C20T bound to DFHO
8FI8	X-ray crystallography	2023-05-10	Structure of Lettuce C20T bound to DFAME
8F4O	X-ray crystallography	2023-05-17	Apo structure of the TPP riboswitch aptamer domain
8EYU	X-ray crystallography	2023-05-31	Structure of Beetroot dimer bound to DFAME
8EYV	X-ray crystallography	2023-05-31	Structure of Beetroot dimer bound to DFHO
8EYW	X-ray crystallography	2023-05-31	Beetroot dimer bound to ThT
8F0N	X-ray crystallography	2023-05-31	Wobble Beetroot (A16U-U38G) dimer bound to DFHO
8G8Z	Cryo-electron microscopy	2023-06-21	Cryo-EM structure of 3DVA component 1 of Escherichia coli que-PEC (paused elongation complex) RNA Polymerase plus preQ1 ligand
8J1Q	Cryo-electron microscopy	2023-06-21	CryoEM structure of SARS CoV-2 RBD and Aptamer complex
8J26	Cryo-electron microscopy	2023-06-21	CryoEM structure of SARS CoV-2 RBD and Aptamer complex
8BW5	X-ray crystallography	2023-07-19	X-ray structure of the complex between human alpha thrombin and the duplex/quadruplex aptamer M08s-1_41mer
8IF5	NMR	2023-07-19	AFB1-AF26 aptamer complex
8FW4	X-ray crystallography	2023-07-26	Crystal structure of the adenosylcobalamin riboswitch holo conformation in absence of ligand
