# Supplementary material for: Structural Insights into Protein–Aptamer Recognitions Emerged from Experimental and Computational Studies
Source: Int J Mol Sci. 2023 Nov 14;24(22):16318. doi: 10.3390/ijms242216318 (PMC10671752; doi:10.3390/ijms242216318)
Supplement: Supplementary file 1 [file ijms-24-16318-s001.zip › TableS2.xls]

## Sheet: Table S2
Entry	PDB ID	Release Year	Experimental Method	Resolution (Å)
1	1HUT	1994	X-ray crystallography	2.90
2	1HAO	1996	X-ray crystallography	2.80
3	1HAP	1996	X-ray crystallography	2.80
4	1ULL	1997	NMR	-
5	6MSF	1998	X-ray crystallography	2.80
6	5MSF	1998	X-ray crystallography	2.80
7	7MSF	1998	X-ray crystallography	2.80
8	484D	1999	NMR	-
9	1EXD	2000	X-ray crystallography	2.70
10	1EXY	2000	NMR	-
11	1OOA	2003	X-ray crystallography	2.45
12	1U1Y	2004	X-ray crystallography	2.85
13	2B63	2005	X-ray crystallography	3.80
14	3DD2	2008	X-ray crystallography	1.90
15	3EGZ	2008	X-ray crystallography	2.20
16	3HXO	2009	X-ray crystallography	2.40
17	3HXQ	2009	X-ray crystallography	2.69
18	3IRW	2009	X-ray crystallography	2.70
19	3AGV	2010	X-ray crystallography	2.15
20	3HSB	2010	X-ray crystallography	2.20
21	3AHU	2011	X-ray crystallography	2.20
22	3MUM	2010	X-ray crystallography	2.90
23	3MUR	2010	X-ray crystallography	3.00
24	3MUT	2010	X-ray crystallography	3.00
25	3MUV	2010	X-ray crystallography	3.20
26	3MXH	2010	X-ray crystallography	2.30
27	3QLP	2011	X-ray crystallography	2.14
28	3UCU	2012	X-ray crystallography	2.80
29	3UCZ	2012	X-ray crystallography	2.80
30	3UD3	2012	X-ray crystallography	3.10
31	3UD4	2012	X-ray crystallography	2.70
32	3UZS	2012	X-ray crystallography	4.52
33	3UZT	2012	X-ray crystallography	3.51
34	3V7E	2012	X-ray crystallography	2.80
35	4DIH	2012	X-ray crystallography	1.80
36	4DII	2012	X-ray crystallography	2.05
37	4HQU	2012	X-ray crystallography	2.20
38	4HQX	2012	X-ray crystallography	2.30
39	2RSK	2013	NMR	-
40	2RU7	2013	NMR	-
41	3ZH2	2013	X-ray crystallography	2.10
42	4I7Y	2013	X-ray crystallography	2.40
43	4M4O	2013	X-ray crystallography	2.00
44	4M6D	2013	X-ray crystallography	2.68
45	4KZD	2014	X-ray crystallography	2.19
46	4KZE	2014	X-ray crystallography	2.40
47	4Q9Q	2014	X-ray crystallography	2.45
48	4Q9R	2014	X-ray crystallography	3.12
49	4LZ1	2014	X-ray crystallography	1.65
50	4LZ4	2014	X-ray crystallography	2.56
51	4NI7	2014	X-ray crystallography	2.40
52	4NI9	2014	X-ray crystallography	2.55
53	4PDB	2014	X-ray crystallography	2.60
54	4R8I	2015	X-ray crystallography	2.05
55	4WB2	2015	X-ray crystallography	1.80
56	4WB3	2015	X-ray crystallography	2.00
57	4YB1	2015	X-ray crystallography	2.08
58	4ZBN	2015	X-ray crystallography	2.45
59	5D3G	2015	X-ray crystallography	2.30
60	5CMX	2016	X-ray crystallography	2.98
61	5DO4	2016	X-ray crystallography	1.86
62	5EW1	2016	X-ray crystallography	2.95
63	5EW2	2016	X-ray crystallography	3.59
64	5HLF	2016	X-ray crystallography	2.95
65	5HP1	2016	X-ray crystallography	2.90
66	5HRO	2016	X-ray crystallography	2.75
67	5I3U	2016	X-ray crystallography	3.00
68	5I42	2016	X-ray crystallography	3.30
69	5HRT	2016	X-ray crystallography	2.00
70	5HRU	2016	X-ray crystallography	1.71
71	5HTO	2016	X-ray crystallography	1.90
72	5MJV	2017	X-ray crystallography	3.09
73	5UC6	2017	X-ray crystallography	2.10
74	6B14	2017	X-ray crystallography	1.64
75	6B3K	2017	X-ray crystallography	2.09
76	6EO6	2017	X-ray crystallography	1.69
77	6EO7	2017	X-ray crystallography	2.24
78	5VOE	2018	X-ray crystallography	2.00
79	5VOF	2018	X-ray crystallography	2.25
80	5XN0	2018	X-ray crystallography	2.60
81	5XN1	2018	X-ray crystallography	2.45
82	5XN2	2018	X-ray crystallography	2.38
83	6BHJ	2018	X-ray crystallography	2.81
84	6CF2	2018	X-ray crystallography	3.00
85	6DB8	2018	X-ray crystallography	1.87
86	6DB9	2018	X-ray crystallography	2.02
87	6EVV	2018	X-ray crystallography	2.50
88	6GN7	2018	X-ray crystallography	2.80
89	6RTI	2020	X-ray crystallography	2.20
90	6SY4	2020	X-ray crystallography	2.69
91	6SY6	2020	X-ray crystallography	2.90
92	6TXR	2020	X-ray crystallography	2.50
93	6U81	2020	X-ray crystallography	2.34
94	6U82	2020	X-ray crystallography	3.21
95	7D7V	2020	X-ray crystallography	2.80
96	7JTN	2020	X-ray crystallography	3.10
97	7JTQ	2020	X-ray crystallography	3.50
98	6VUG	2021	X-ray crystallography	3.00
99	6Z8V	2021	X-ray crystallography	1.58
100	6Z8W	2021	X-ray crystallography	1.73
101	6Z8X	2021	X-ray crystallography	2.53
102	7F49	2021	X-ray crystallography	2.09
103	7MK1	2021	X-ray crystallography	1.90
104	7NTU	2021	X-ray crystallography	3.10
105	7OXQ	2021	X-ray crystallography	3.30
106	7OZ2	2021	X-ray crystallography	2.85
107	7OZ5	2021	X-ray crystallography	3.37
108	7OZW	2021	Cryo-electron microscopy	3.38
109	7P15	2021	Cryo-electron microscopy	3.58
110	7LRI	2022	X-ray crystallography	3.05
111	7LRM	2022	X-ray crystallography	3.14
112	7LRX	2022	X-ray crystallography	2.90
113	7LRY	2022	X-ray crystallography	2.45
114	7LSK	2022	X-ray crystallography	2.70
115	7SZU	2022	X-ray crystallography	2.24
116	7U0Y	2022	X-ray crystallography	2.66
117	7V5N	2022	X-ray crystallography	1.70
118	7YQ3	2022	Cryo-electron microscopy	3.60
119	7YQ4	2022	Cryo-electron microscopy	3.95
120	7YQ5	2022	Cryo-electron microscopy	4.27
121	7YQ6	2022	Cryo-electron microscopy	4.18
122	7Z24	2022	Cryo-electron microscopy	3.32
123	7Z29	2022	Cryo-electron microscopy	3.38
124	7Z2D	2022	Cryo-electron microscopy	3.38
125	7Z2E	2022	Cryo-electron microscopy	3.45
126	7Z2G	2022	Cryo-electron microscopy	3.65
127	7Z2H	2022	Cryo-electron microscopy	3.58
128	7ZKL	2022	X-ray crystallography	3.18
129	7ZKM	2022	X-ray crystallography	2.00
130	7ZKN	2022	X-ray crystallography	3.03
131	7ZKO	2022	X-ray crystallography	2.50
132	7ZQS	2022	Cryo-electron microscopy	2.54
133	8D29	2022	X-ray crystallography	1.81
134	8DK7	2022	X-ray crystallography	2.46
135	8BW5	2023	X-ray crystallography	2.80
136	8F3C	2023	Cryo-electron microscopy	3.40
137	8G00	2023	Cryo-electron microscopy	3.40
138	8G1S	2023	Cryo-electron microscopy	3.70
139	8G2W	2023	Cryo-electron microscopy	3.70
140	8G4W	2023	Cryo-electron microscopy	3.80
141	8G7E	2023	Cryo-electron microscopy	3.90
142	8G8Z	2023	Cryo-electron microscopy	4.30
143	8J1Q	2023	Cryo-electron microscopy	3.30
144	8J26	2023	Cryo-electron microscopy	3.40
