# Supplementary material for: Structural Insights into Protein–Aptamer Recognitions Emerged from Experimental and Computational Studies
Source: Int J Mol Sci. 2023 Nov 14;24(22):16318. doi: 10.3390/ijms242216318 (PMC10671752; doi:10.3390/ijms242216318)
Supplement: Supplementary file 1 [file ijms-24-16318-s001.zip › TableS3.xls]

## Sheet: Table S3
PDB ID of the Protein-Bound Aptamer/Length (nt)	PDB ID of the Protein-Unbound Aptamer/Length (nt)	Alignment Coverage (nt)	Alignment Coverage (%)		Sequence Identity (%)
			Protein-Bound Aptamer	Protein-Unbound Aptamer
1HAO/15	148D/15	15	100	100	100
	1C32/15	15	100	100	100
	1C34/15	15	100	100	100
	1C35/15	15	100	100	100
	1C38/15	15	100	100	100
	5MJX/15	15	100	100	100
	7V3T/15	15	100	100	100
	1QDF/15	15	100	100	100
	1QDH/15	15	100	100	100
	2LYG/15	15	100	100	100
	2IDN/15	15	100	100	100
	1RDE/15	15	100	100	100
	2MKO/11	11	73	100	100
	2MKM/11	11	73	100	100
	7D31/15	15	100	100	100
	7D32/15	15	100	100	100
	7D33/15	14	93	93	93.3
	7W9N/33	10	67	30	90.9
1HAP/15	148D/15	15	100	100	100
	1C32/15	15	100	100	100
	1C34/15	15	100	100	100
	1C35/15	15	100	100	100
	1C38/15	15	100	100	100
	5MJX/15	15	100	100	100
	7V3T/15	15	100	100	100
	1QDH/15	15	100	100	100
	1RDE/15	15	100	100	100
	1QDF/15	15	100	100	100
	2LYG/15	15	100	100	100
	2IDN/15	15	100	100	100
	2MKO/11	11	73	100	100
	2MKM/11	11	73	100	100
	7D31/15	15	100	100	100
	7D32/15	15	100	100	100
	7D33/15	14	93	93	93.3
	7W9N/33	10	67	30	90.9
1HUT/15	148D/15	15	100	100	100
	1C32/15	15	100	100	100
	1C34/15	15	100	100	100
	1C35/15	15	100	100	100
	1C38/15	15	100	100	100
	5MJX/15	15	100	100	100
	7V3T/15	15	100	100	100
	1RDE/15	15	100	100	100
	1QDH/15	15	100	100	100
	1QDF/15	15	100	100	100
	2IDN/15	15	100	100	100
	2LYG/15	15	100	100	100
	2MKO/11	11	73	100	100
	2MKM/11	11	73	100	100
	7D31/15	15	100	100	100
	7D32/15	15	100	100	100
	7D33/15	14	93	93	93.3
	7W9N/33	10	67	30	90.9
3HXO/42	7QB3/28	7	17	25	100
	1OLD/24	9	21	38	90
3HXQ/42	7QB3/28	7	17	25	100
	1OLD/24	9	21	38	90
3QLP/15	148D/15	15	100	100	100
	2IDN/15	15	100	100	100
	2LYG/15	15	100	100	100
	1QDF/15	15	100	100	100
	1QDH/15	15	100	100	100
	1RDE/15	15	100	100	100
	5MJX/15	15	100	100	100
	7V3T/15	15	100	100	100
	1C32/15	15	100	100	100
	1C34/15	15	100	100	100
	1C35/15	15	100	100	100
	1C38/15	15	100	100	100
	2MKO/11	11	73	100	100
	2MKM/11	11	73	100	100
	7D31/15	15	100	100	100
	7D32/15	15	100	100	100
	7D33/15	14	93	93	93.3
	7W9N/33	10	67	30	90.9
3ZH2/35	7XH9/16	8	23	50	100
4DIH/15	148D/15	15	100	100	100
	1C32/15	15	100	100	100
	1C34/15	15	100	100	100
	1C35/15	15	100	100	100
	1C38/15	15	100	100	100
	1QDF/15	15	100	100	100
	1QDH/15	15	100	100	100
	1RDE/15	15	100	100	100
	2IDN/15	15	100	100	100
	2LYG/15	15	100	100	100
	2MKM/11	11	73	100	100
	2MKO/11	11	73	100	100
	5MJX/15	15	100	100	100
	7D31/15	15	100	100	100
	7D32/15	15	100	100	93.3
	7D33/15	14	93	93	100
	7V3T/15	15	100	100	100
	7W9N/33	10	67	30	90.9
4DII/15	148D/15	15	100	100	100
	1C32/15	15	100	100	100
	1C34/15	15	100	100	100
	1C35/15	15	100	100	100
	1C38/15	15	100	100	100
	1QDF/15	15	100	100	100
	1QDH/15	15	100	100	100
	1RDE/15	15	100	100	100
	2IDN/15	15	100	100	100
	2LYG/15	15	100	100	100
	7V3T/15	15	100	100	100
	5MJX/15	15	100	100	100
	2MKO/11	11	73	100	100
	2MKM/11	11	73	100	100
	7D31/15	15	100	100	100
	7D32/15	15	100	100	93.3
	7D33/15	15	100	100	100
	7W9N/33	10	67	30	90.9
4I7Y/27	148D/15	9	33	60	90
	1C32/15	9	33	60	90
	1C34/15	9	33	60	90
	1C35/15	9	33	60	90
	1C38/15	9	33	60	90
	1QDF/15	9	33	60	90
	1QDH/15	9	33	60	90
	1RDE/15	9	33	60	90
	2IDN/15	9	33	60	90
	2LYG/15	9	33	60	90
	2MKM/11	9	33	82	90
	2MKO/11	9	33	82	90
	5MJX/15	9	33	60	90
	7D31/15	9	33	60	90
	7D32/15	9	33	60	90
	7E5P/16	7	26	44	100
	7V3T/15	9	33	60	90
4LZ1/15	148D/15	15	100	100	100
	1C32/15	15	100	100	100
	1C34/15	15	100	100	100
	1C35/15	15	100	100	100
	1C38/15	15	100	100	100
	1QDF/15	15	100	100	100
	1QDH/15	15	100	100	100
	1RDE/15	15	100	100	100
	2IDN/15	15	100	100	100
	2LYG/15	15	100	100	100
	2MKM/11	11	73	100	100
	2MKO/11	11	73	100	100
	5MJX/15	15	100	100	100
	7D31/15	15	100	100	100
	7D32/15	15	100	100	100
	7D33/15	14	93	93	93.3
	7V3T/15	15	100	100	100
	7W9N/33	11	73	33	100
4LZ4/15	148D/15	15	100	100	100
	1C32/15	15	100	100	100
	1C34/15	15	100	100	100
	1C35/15	15	100	100	100
	1C38/15	15	100	100	100
	1QDF/15	15	100	100	100
	1QDH/15	15	100	100	100
	1RDE/15	15	100	100	100
	2IDN/15	15	100	100	100
	2LYG/15	15	100	100	100
	2MKM/11	11	73	100	100
	2MKO/11	11	73	100	100
	5MJX/15	15	100	100	100
	7D31/15	15	100	100	100
	7D32/15	15	100	100	100
	7D33/15	14	93	93	93.3
	7V3T/15	15	100	100	100
	7W9N/33	10	67	30	90.9
	7XHD/16	8	53	50	100
4WB2/40	7E5P/16	9	23	56	100
	7XHD/16	8	20	50	100
5CMX/31	148D/15	15	48	100	100
	1C32/15	15	48	100	100
	1C34/15	15	48	100	100
	1C35/15	15	48	100	100
	1C38/15	15	48	100	100
	1QDF/15	15	48	100	100
	1QDH/15	15	48	100	100
	1RDE/15	15	48	100	100
	2IDN/15	15	48	100	100
	2LYG/15	15	48	100	100
	2MKM/11	11	35	100	100
	2MKO/11	11	35	100	100
	5MJX/15	15	48	100	100
	7D31/15	15	48	100	100
	7D32/15	15	48	100	100
	7D33/15	14	45	93	93.3
	7E5P/16	7	23	44	100
	7V3T/15	15	48	100	100
	7W9N/33	10	32	30	90.9
5EW1/15	148D/15	15	100	100	100
	1C32/15	15	100	100	100
	1C34/15	15	100	100	100
	1C35/15	15	100	100	100
	1C38/15	15	100	100	100
	1QDF/15	15	100	100	100
	1QDH/15	15	100	100	100
	1RDE/15	15	100	100	100
	2IDN/15	15	100	100	100
	2LYG/15	9	60	60	90
5EW1/27	2LYG/15	9	33	60	90
	2MKM/11	9	33	82	90
	2MKO/11	9	33	82	90
	5MJX/15	9	33	60	90
	7D31/15	9	33	60	90
	7D32/15	9	33	60	90
	7E5P/16	7	26	44	100
	7V3T/15	9	33	60	90
5EW2/15	148D/15	15	100	100	100
	1C32/15	15	100	100	100
	1C34/15	15	100	100	100
	1C35/15	15	100	100	100
	1C38/15	15	100	100	100
	1QDF/15	15	100	100	100
	1QDH/15	15	100	100	100
	1RDE/15	15	100	100	100
	2IDN/15	15	100	100	100
5EW2/27	2LYG/15	9	33	60	100
	2MKM/11	9	33	82	100
	2MKO/11	9	33	82	100
	5MJX/15	9	33	60	100
	7D31/15	9	33	60	100
	7D32/15	9	33	60	100
	7E5P/16	7	26	44	100
	7V3T/15	9	33	60	100
5HOD/20	7W9N/33	7	35	21	100
5HRT/34	7D33/15	7	21	47	100
	1I34/20	7	21	35	100
	2M53/25	7	21	28	100
5I3U/39	7XIE/16	7	18	44	100
6EO6/15	148D/15	15	100	100	100
	1C32/15	15	100	100	100
	1C34/15	15	100	100	100
	1C35/15	15	100	100	100
	1C38/15	15	100	100	100
	1QDF/15	15	100	100	100
	1QDH/15	15	100	100	100
	1RDE/15	15	100	100	100
	2IDN/15	15	100	100	100
	2LYG/15	15	100	100	100
	2MKM/11	11	73	100	100
	2MKO/11	11	73	100	100
	5MJX/15	15	100	100	100
	7D31/15	15	100	100	100
	7D32/15	15	100	100	100
	7D33/15	14	93	93	93.3
	7V3T/15	15	100	100	100
	7W9N/33	10	67	30	90.9
6EO7/15	148D/15	15	100	100	100
	1C32/15	15	100	100	100
	1C34/15	15	100	100	100
	1C35/15	15	100	100	100
	1C38/15	15	100	100	100
	1QDF/15	15	100	100	100
	1QDH/15	15	100	100	100
	1RDE/15	15	100	100	100
	2IDN/15	15	100	100	100
	2LYG/15	15	100	100	100
	2MKM/11	11	73	100	100
	2MKO/11	11	73	100	100
	5MJX/15	15	100	100	100
	7D31/15	15	100	100	100
	7D32/15	15	100	100	100
	7D33/15	14	93	93	93.3
	7V3T/15	15	100	100	100
	7W9N/33	10	67	30	90.9
6EVV/26	7XHD/16	9	35	56	100
	7E5P/16	7	27	44	100
	7W9N/33	7	27	21	100
6GN7/26	7XHD/16	9	35	56	100
	7E5P/16	7	27	44	100
	7W9N/33	7	27	21	100
6Z8V/15	148D/15	15	100	100	100
	1C32/15	15	100	100	100
	1C34/15	15	100	100	100
	1C35/15	15	100	100	100
	1C38/15	15	100	100	100
	1QDF/15	15	100	100	100
	1QDH/15	15	100	100	100
	1RDE/15	15	100	100	100
	2IDN/15	15	100	100	100
	2LYG/15	15	100	100	100
	2MKM/11	11	73	100	100
	2MKO/11	11	73	100	100
	5MJX/15	15	100	100	100
	7D31/15	15	100	100	100
	7D32/15	15	100	100	100
	7D33/15	14	93	93	93.3
	7V3T/15	15	100	100	100
	7W9N/33	10	67	30	90.9
6Z8W/15	148D/15	15	100	100	100
	1C32/15	15	100	100	100
	1C34/15	15	100	100	100
	1C35/15	15	100	100	100
	1C38/15	15	100	100	100
	1QDF/15	15	100	100	100
	1QDH/15	15	100	100	100
	1RDE/15	15	100	100	100
	2IDN/15	15	100	100	100
	2LYG/15	15	100	100	100
	2MKM/11	11	73	100	100
	2MKO/11	11	73	100	100
	5MJX/15	15	100	100	100
	7D31/15	15	100	100	100
	7D32/15	15	100	100	100
	7D33/15	14	93	93	93.3
	7V3T/15	15	100	100	100
	7W9N/33	10	67	30	90.9
6Z8X/15	148D/15	15	100	100	100
	1C32/15	15	100	100	100
	1C34/15	15	100	100	100
	1C35/15	15	100	100	100
	1C38/15	15	100	100	100
	1QDF/15	15	100	100	100
	1QDH/15	15	100	100	100
	1RDE/15	15	100	100	100
	2IDN/15	15	100	100	100
	2LYG/15	15	100	100	100
	2MKM/11	11	73	100	100
	2MKO/11	11	73	100	100
	5MJX/15	15	100	100	100
	7D31/15	15	100	100	100
	7D32/15	15	100	100	100
	7D33/15	14	93	93	93.3
	7V3T/15	15	100	100	100
	7W9N/33	10	67	30	90.9
	7XHD/16	8	53	50	100
7NTU/26	7E5P/16	7	27	44	90
	7W9N/33	7	27	21	100
	7XHD/16	9	35	56	100
7NTU/27	148D/15	9	33	60	90
	1C32/15	9	33	60	90
	1C34/15	9	33	60	90
	1C35/15	9	33	60	90
	1C38/15	9	33	60	90
	1QDF/15	9	33	60	90
	1QDH/15	9	33	60	90
	1RDE/15	9	33	60	90
	2IDN/15	9	33	60	90
	2LYG/15	9	33	60	90
	2MKM/11	9	33	82	90
	2MKO/11	9	33	82	90
	5MJX/15	9	33	60	90
	7D31/15	9	33	60	90
	7D32/15	9	33	60	90
	7E5P/16	7	26	44	100
	7V3T/15	9	33	60	90
7V5N/24	148D/15	8	33	53	100
	1C32/15	8	33	53	100
	1C34/15	8	33	53	100
	1C35/15	8	33	53	100
	1C38/15	8	33	53	100
	1QDF/15	8	33	53	100
	1QDH/15	8	33	53	100
	1RDE/15	8	33	53	100
	2IDN/15	8	33	53	100
	2LYG/15	8	33	53	100
	2MKM/11	8	33	73	100
	2MKO/11	8	33	73	100
	5MJX/15	8	33	53	100
	7D31/15	8	33	53	100
	7D32/15	8	33	53	100
	7D33/15	7	29	47	100
	7V3T/15	8	33	53	100
	7XHD/16	9	38	56	90
7ZKL/15	148D/15	15	100	100	100
	1C32/15	15	100	100	100
	1C34/15	15	100	100	100
	1C35/15	15	100	100	100
	1C38/15	15	100	100	100
	1QDF/15	15	100	100	100
	1QDH/15	15	100	100	100
	1RDE/15	15	100	100	100
	2IDN/15	15	100	100	100
	2LYG/15	15	100	100	100
	2MKM/11	11	73	100	100
	2MKO/11	11	73	100	100
	5MJX/15	15	100	100	100
	7D31/15	15	100	100	100
	7D32/15	15	100	100	100
	7D33/15	14	93	93	93.3
	7V3T/15	15	100	100	100
	7W9N/33	10	67	30	90.9
7ZKM/15	148D/15	15	100	100	100
	1C32/15	15	100	100	100
	1C34/15	15	100	100	100
	1C35/15	15	100	100	100
	1C38/15	15	100	100	100
	1QDF/15	15	100	100	100
	1QDH/15	15	100	100	100
	1RDE/15	15	100	100	100
	2IDN/15	15	100	100	100
	2LYG/15	15	100	100	100
	2MKM/11	11	73	100	100
	2MKO/11	11	73	100	100
	5MJX/15	15	100	100	100
	7D31/15	15	100	100	100
	7D32/15	15	100	100	100
	7D33/15	14	93	93	93.3
	7V3T/15	15	100	100	100
	7W9N/33	10	67	30	90.9
7ZKN/15	148D/15	15	100	100	100
	1C32/15	15	100	100	100
	1C34/15	15	100	100	100
	1C35/15	15	100	100	100
	1C38/15	15	100	100	100
	1QDF/15	15	100	100	100
	1QDH/15	15	100	100	100
	1RDE/15	15	100	100	100
	2IDN/15	15	100	100	100
	2LYG/15	15	100	100	100
	2MKM/11	11	73	100	100
	2MKO/11	11	73	100	100
	5MJX/15	15	100	100	100
	7D31/15	15	100	100	100
	7D32/15	15	100	100	100
	7D33/15	14	93	93	93.3
	7V3T/15	15	100	100	100
	7W9N/33	10	67	30	90.9
7ZKO/15	148D/15	15	100	100	100
	1C32/15	15	100	100	100
	1C34/15	15	100	100	100
	1C35/15	15	100	100	100
	1C38/15	15	100	100	100
	1QDF/15	15	100	100	100
	1QDH/15	15	100	100	100
	1RDE/15	15	100	100	100
	2IDN/15	15	100	100	100
	2LYG/15	15	100	100	100
	2MKM/11	11	73	100	100
	2MKO/11	11	73	100	100
	5MJX/15	15	100	100	100
	7D31/15	15	100	100	100
	7D32/15	15	100	100	100
	7D33/15	14	93	93	93.3
	7V3T/15	15	100	100	100
	7W9N/33	10	67	30	90.9
7ZQS/51	7W9N/33	10	20	30	100
