# Supplementary material for: Structural Insights into Protein–Aptamer Recognitions Emerged from Experimental and Computational Studies
Source: Int J Mol Sci. 2023 Nov 14;24(22):16318. doi: 10.3390/ijms242216318 (PMC10671752; doi:10.3390/ijms242216318)
Supplement: Supplementary file 1 [file ijms-24-16318-s001.zip › TableS4.xls]

## Sheet: Table S4
PDB ID of the Protein-Bound Aptamer/Length (nt)	PDB ID of the Protein-Unbound Aptamer/Length (nt)	Alignment Coverage (nt)	Alignment Coverage (%)		Sequence Identity (%)
			Protein-Bound Aptamer	Protein-Unbound Aptamer
1EXY/33	4MS9/10	8	24	80	100
	4MSB/10	8	24	80	100
	4MSR/10	8	24	80	100
1OOA/29	2JWV/29	27	93	93	100
2RSK/12	6C63/32	11	92	34	90.9
	6C65/30	11	92	37	90.9
	6K84/25	12	100	48	100
2RU7/12	6C63/32	11	92	34	90.9
	6C65/30	11	92	37	90.9
	6K84/25	12	100	48	100
3AGV/24	4Y1M/107	16	71	17	100
	7KVT/83	18	75	22	94.4
	7KVU/83	18	75	22	94.4
	7KVV/83	18	75	22	94.4
3EGZ/65	6V9B/28	16	25	57	87.5
	6V9D/28	16	25	57	87.5
3V7E/126	3IQP/94	49	39	52	100
	3IQR/94	49	39	52	100
	2GIS/94	49	39	52	100
	3IQN/94	49	39	52	98
4KZD/84	4ERL/161	84	100	52	100
	7L0Z/69	57	68	83	82.5
	5OB3/69	57	68	83	82.5
	4TS2/44	36	43	82	88.9
	4TS0/44	36	43	82	88.9
	4TS0/48	37	44	77	100
	4TS2/48	37	44	77	100
4PDB/38	2LUN/28	22	58	79	90.9
4Q9Q/84	4ERL/84	84	100	100	100
	7L0Z/69	57	68	83	82.5
	5OB3/69	57	68	83	82.5
	4TS2/44	36	43	82	88.9
	4TS0/44	36	43	82	88.9
	4TS0/48	37	44	77	100
	4TS2/48	37	44	77	100
4Q9R/84	4ERL/84	84	100	100	100
	7L0Z/69	57	68	83	82.5
	5OB3/69	57	68	83	82.5
	4TS2/44	36	43	82	88.9
	4TS0/44	36	43	82	88.9
	4TS0/48	37	44	77	100
	4TS2/48	37	44	77	100
6B14/83	4ERL/84	83	99	100	100
	7L0Z/69	57	69	83	82.5
	5OB3/69	57	69	83	82.5
	4TS2/44	36	43	82	88.9
	4TS0/44	36	43	82	88.9
	4TS0/48	37	45	77	100
	4TS2/48	37	45	77	100
6B3K/83	4ERL/84	83	99	100	97.6
	5OB3/69	57	69	83	82.5
	7L0Z/69	57	69	83	82.5
	4TS2/44	36	43	82	88.9
	4TS0/44	36	43	82	88.9
	4TS2/48	37	45	77	100
	4TS0/48	37	45	77	100
8D29/34	1O15/33	33	97	100	88.2
	8D2A/33	32	94	97	87.5
	8D28/33	32	94	97	87.5
	8D5O/33	32	94	97	87.5
	8D5L/33	32	94	97	87.5
	8D2B/33	32	94	97	87.5
8DK7/34	1O15/33	33	97	100	88.2
	8D2A/33	32	94	97	87.5
	8D28/33	32	94	97	87.5
	8D5O/33	32	94	97	87.5
	8D5L/33	32	94	97	87.5
	8D2B/33	32	94	97	87.5
